# Supplementary material for: Terpolymerization of Substituted Cycloolefin with Ethylene and Norbornene by Transition Metal Catalyst
Source: MDPI journal article supplement (doi:10.3390/polym8030060), 2016-02-26
Supplement: s1 [file s1]

# Supplementary Materials: Terpolymerization of Substituted Cycloolefin with Ethylene and Norbornene by Transition Metal Catalyst

Laura Boggioni, Nella Galotto Galotto, Fabio Bertini and Incoronata Tritto

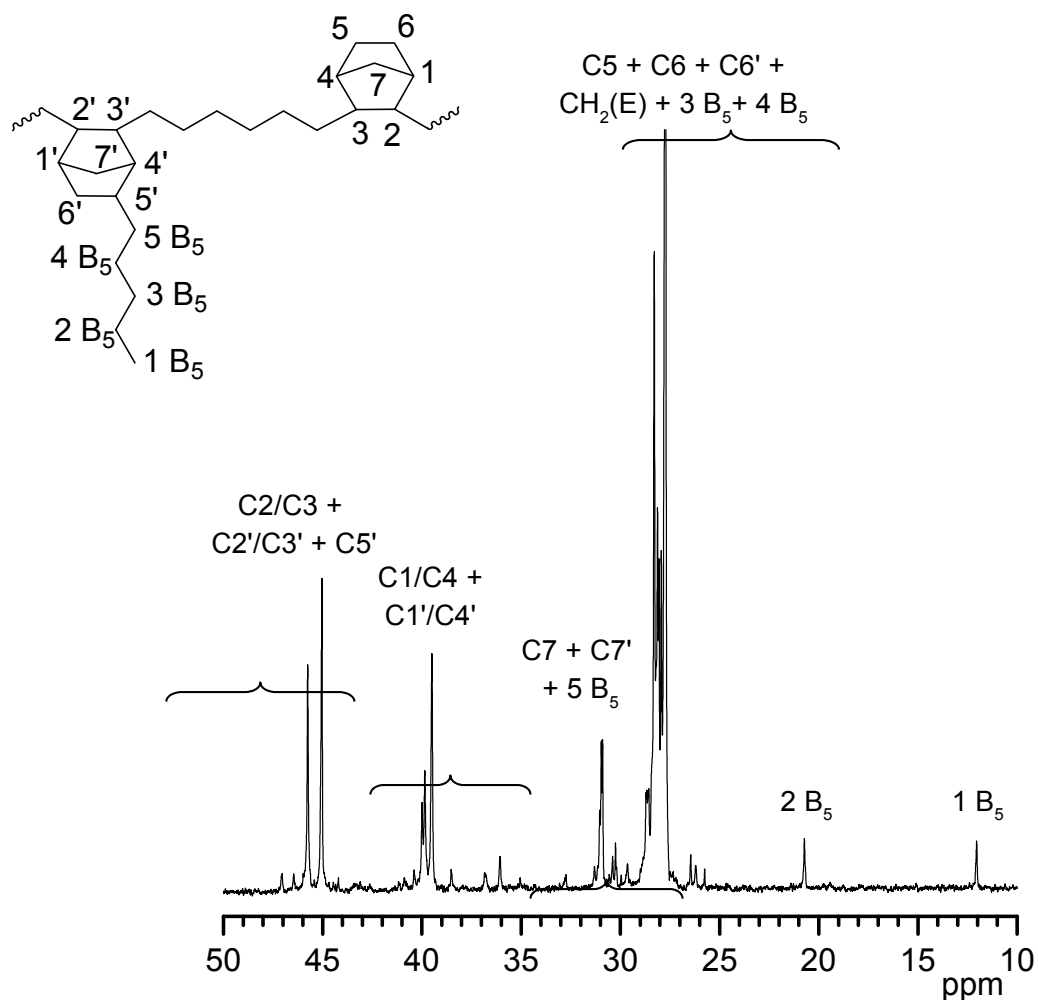

**Figure S1.** <sup>13</sup>C NMR spectrum (108.58 MHz, C<sub>2</sub>D<sub>2</sub>Cl<sub>4</sub>, 103 °C) of poly(E-ter-N-ter-C<sub>5</sub>N), sample prepared by **1** (Table 2, entry 5).

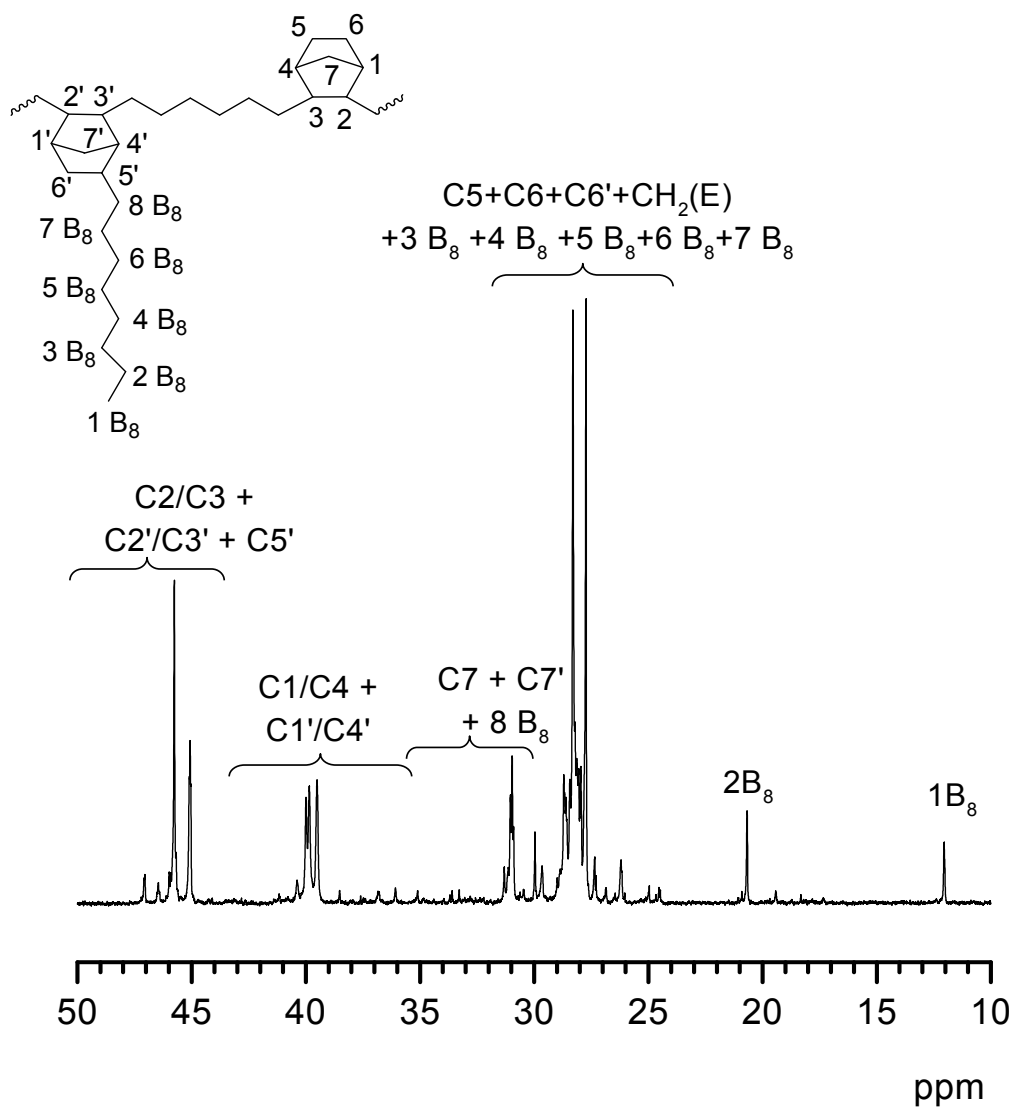

**Figure S2.** <sup>13</sup>C NMR spectrum (108.58 MHz, C<sub>2</sub>D<sub>2</sub>C<sub>14</sub>, 103 °C) of poly(E-ter-N-ter-C8N), sample prepared by 1 (Table 2, entry 6).

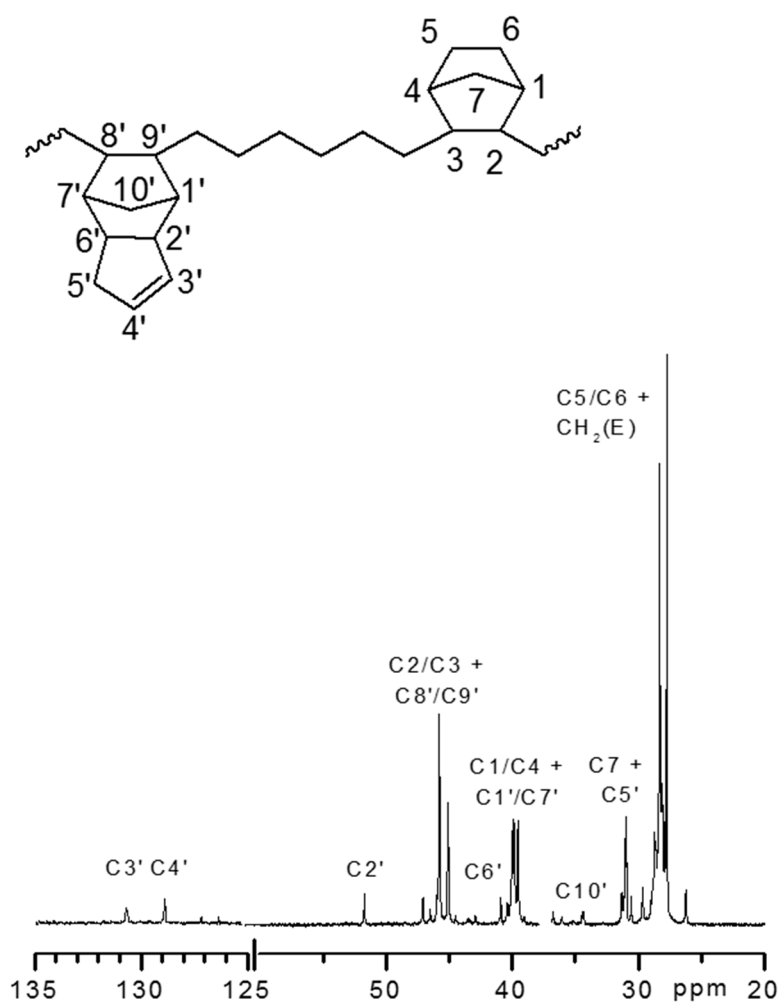

**Figure S3.** <sup>13</sup>C NMR spectrum (108.58 MHz, C<sub>2</sub>D<sub>2</sub>C<sub>14</sub>, 103 °C) of poly(E-ter-N-ter-DCPD), sample prepared by 1 (Table 2, entry 7).

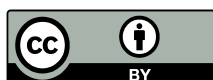

© 2016 by the authors; licensee MDPI, Basel, Switzerland. This article is an open access article distributed under the terms and conditions of the Creative Commons by Attribution (CC-BY) license (<http://creativecommons.org/licenses/by/4.0/>).
